# Supplementary material
Source: PubMed Central journal article supplement (PMC4679867)
Supplement: supp_kfv123_toxsci-15-0366-File009.pdf [file supp_kfv123_toxsci-15-0366-File009.pdf]

# **SUPPLEMENT**

## **Developmental Neurotoxicity of Tobacco Smoke Directed Toward Cholinergic and Serotonergic Systems: More than Just Nicotine**

Theodore A. Slotkin<sup>1</sup>, Samantha Skavicus<sup>1</sup>, Jennifer Card<sup>1</sup>,  
Ashley Stadler<sup>1</sup>, Edward D. Levin<sup>2</sup> and Frederic J. Seidler<sup>1</sup>

<sup>1</sup>Department of Pharmacology & Cancer Biology

<sup>2</sup>Department of Psychiatry & Behavioral Sciences

Duke University Medical Center

Durham, NC 27710 USA

### **Contents:**

Figure S1. nAChR binding in adult female rats

Table S1. Body and brain region weights

Table S2. ChAT activity

Table S3. HC3 binding

Table S4. HC3/ChAT ratio

Table S5. nAChR binding

Table S6. 5HT receptor binding

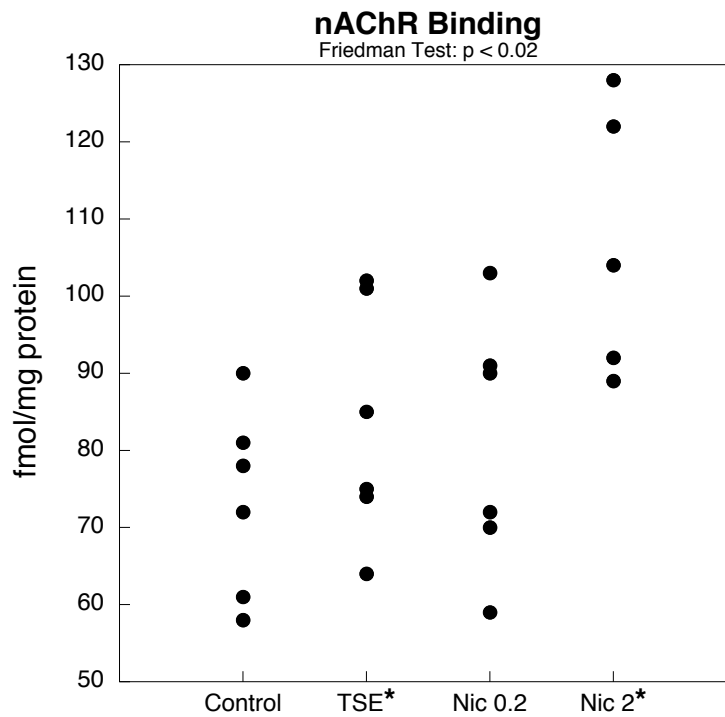

**FIGURE S1**

Non-pregnant, adult female rats were implanted with minipumps delivering TSE, nicotine (Nic) 0.2 mg/kg/day or nicotine 2 mg/kg/day, and cerebrocortical nAChR binding was evaluated after four weeks. Statistical comparisons were conducted non-parametrically because the distribution of values in each group was non-Gaussian (no central cluster). The Friedman test was conducted by matching the highest value in each group, then the next highest, then the third highest, etc. Asterisks denote treatment groups that differ significantly from control (post-hoc Wilcoxon signed-rank test). There was no significant difference between TSE and Nic 0.2.

**TABLE S1: Body and Brain Region Weights (mean ± SE)**

|                           | Age | Male     |          |          |          | Female   |          |          |          |
|---------------------------|-----|----------|----------|----------|----------|----------|----------|----------|----------|
|                           |     | Control  | TSE      | Nic 0.2  | Nic 2    | Control  | TSE      | Nic 0.2  | Nic 2    |
| <b>Body Weight (g)</b>    | 30  | 111 ± 3  | 110 ± 3  | 115 ± 4  | 112 ± 2  | 104 ± 1  | 102 ± 4  | 100 ± 2  | 99 ± 1   |
|                           | 60  | 376 ± 11 | 374 ± 11 | 364 ± 13 | 381 ± 9  | 243 ± 1  | 246 ± 6  | 234 ± 3  | 230 ± 6  |
|                           | 100 | 546 ± 11 | 534 ± 14 | 553 ± 14 | 542 ± 9  | 307 ± 11 | 296 ± 5  | 302 ± 9  | 283 ± 6  |
|                           | 150 | 654 ± 18 | 598 ± 8  | 653 ± 11 | 647 ± 15 | 344 ± 8  | 329 ± 6  | 336 ± 9  | 327 ± 3  |
| <b>Region Weight (mg)</b> |     |          |          |          |          |          |          |          |          |
| frontal/parietal cortex   | 30  | 245 ± 8  | 247 ± 7  | 221 ± 8  | 243 ± 6  | 236 ± 14 | 228 ± 3  | 250 ± 11 | 234 ± 7  |
|                           | 60  | 260 ± 6  | 263 ± 15 | 278 ± 11 | 277 ± 12 | 272 ± 11 | 252 ± 11 | 241 ± 11 | 260 ± 7  |
|                           | 100 | 288 ± 16 | 270 ± 12 | 290 ± 9  | 276 ± 6  | 266 ± 11 | 263 ± 11 | 273 ± 6  | 260 ± 14 |
|                           | 150 | 294 ± 11 | 275 ± 14 | 305 ± 9  | 276 ± 5  | 280 ± 11 | 269 ± 14 | 268 ± 11 | 264 ± 13 |
| temporal/occipital cortex | 30  | 166 ± 10 | 173 ± 9  | 177 ± 9  | 160 ± 12 | 173 ± 6  | 177 ± 15 | 175 ± 9  | 187 ± 10 |
|                           | 60  | 177 ± 16 | 203 ± 18 | 184 ± 15 | 186 ± 8  | 176 ± 12 | 179 ± 8  | 170 ± 7  | 181 ± 12 |
|                           | 100 | 196 ± 14 | 206 ± 7  | 208 ± 15 | 204 ± 10 | 179 ± 8  | 196 ± 9  | 177 ± 12 | 181 ± 10 |
|                           | 150 | 194 ± 13 | 183 ± 10 | 200 ± 8  | 178 ± 10 | 173 ± 12 | 179 ± 5  | 168 ± 6  | 173 ± 7  |
| hippocampus               | 30  | 112 ± 8  | 122 ± 5  | 117 ± 6  | 127 ± 10 | 118 ± 7  | 114 ± 5  | 110 ± 7  | 114 ± 5  |
|                           | 60  | 144 ± 6  | 144 ± 6  | 145 ± 9  | 138 ± 5  | 134 ± 4  | 138 ± 4  | 135 ± 4  | 135 ± 5  |
|                           | 100 | 149 ± 5  | 144 ± 4  | 147 ± 5  | 146 ± 6  | 140 ± 7  | 142 ± 7  | 145 ± 7  | 140 ± 8  |
|                           | 150 | 153 ± 4  | 161 ± 3  | 159 ± 6  | 149 ± 11 | 143 ± 8  | 144 ± 2  | 139 ± 10 | 147 ± 8  |
| striatum                  | 30  | 68 ± 5   | 73 ± 7   | 78 ± 8   | 79 ± 10  | 75 ± 7   | 81 ± 9   | 91 ± 13  | 63 ± 6   |
|                           | 60  | 100 ± 7  | 108 ± 10 | 92 ± 5   | 111 ± 8  | 97 ± 3   | 92 ± 7   | 102 ± 9  | 103 ± 4  |
|                           | 100 | 124 ± 9  | 93 ± 6   | 107 ± 4  | 103 ± 9  | 102 ± 8  | 99 ± 7   | 100 ± 8  | 102 ± 10 |
|                           | 150 | 116 ± 9  | 122 ± 6  | 137 ± 6  | 114 ± 9  | 103 ± 7  | 113 ± 6  | 121 ± 7  | 125 ± 8  |
| midbrain                  | 30  | 295 ± 12 | 283 ± 8  | 282 ± 5  | 279 ± 12 | 276 ± 12 | 260 ± 14 | 261 ± 13 | 287 ± 10 |
|                           | 60  | 368 ± 10 | 333 ± 16 | 358 ± 12 | 329 ± 9  | 311 ± 22 | 324 ± 10 | 315 ± 15 | 297 ± 13 |
|                           | 100 | 336 ± 13 | 386 ± 20 | 387 ± 13 | 362 ± 15 | 331 ± 6  | 326 ± 14 | 322 ± 8  | 350 ± 24 |
|                           | 150 | 369 ± 5  | 366 ± 10 | 381 ± 7  | 367 ± 15 | 341 ± 11 | 359 ± 11 | 338 ± 10 | 362 ± 10 |
| brainstem                 | 30  | 163 ± 6  | 173 ± 15 | 174 ± 6  | 164 ± 5  | 156 ± 6  | 164 ± 8  | 162 ± 7  | 173 ± 8  |
|                           | 60  | 219 ± 5  | 222 ± 9  | 221 ± 5  | 213 ± 8  | 224 ± 19 | 212 ± 6  | 200 ± 10 | 209 ± 10 |
|                           | 100 | 255 ± 6  | 247 ± 17 | 260 ± 11 | 250 ± 8  | 226 ± 10 | 235 ± 7  | 231 ± 7  | 245 ± 6  |
|                           | 150 | 269 ± 14 | 274 ± 10 | 279 ± 9  | 259 ± 6  | 241 ± 11 | 244 ± 6  | 237 ± 6  | 254 ± 6  |

Data represent mean ± SE obtained from six animals in each treatment group for each age and sex. For body weight, three-factor ANOVA (treatment, age, sex) indicates a main effect of treatment ( $p < 0.002$ ) but no interactions of treatment with the other factors. Hence, post-hoc comparisons were not conducted for individual ages or sexes. The TSE group had significantly lower weights compared to all other groups:  $p < 0.0003$  vs. control,  $p < 0.006$  vs. Nic 0.2,  $p < 0.02$  vs. Nic 2. The average deficits were 4.5%, 4% and 3%, respectively.

For brain region weight, four-factor ANOVA (treatment, age, sex, region) indicates no significant treatment effects and no interactions of treatment with the other factors. Note that weights for frontal/parietal cortex and temporal/occipital cortex are for the right hemisphere only.

Abbreviations: Nic 0.2 = Nicotine 0.2 mg/kg/day; Nic 2 = Nicotine 2 mg/kg/day.

**TABLE S2: ChAT Activity (mean ± SE)**

| Region                    | Postnatal Age | Male (pmol/min per mg protein) |             |             |             | Female (pmol/min per mg protein) |             |             |             |
|---------------------------|---------------|--------------------------------|-------------|-------------|-------------|----------------------------------|-------------|-------------|-------------|
|                           |               | Control                        | TSE         | Nic 0.2     | Nic 2       | Control                          | TSE         | Nic 0.2     | Nic 2       |
| frontal/parietal cortex   | 30            | 0.81 ± 0.04                    | 0.84 ± 0.04 | 0.99 ± 0.05 | 0.87 ± 0.04 | 0.85 ± 0.02                      | 0.82 ± 0.02 | 0.94 ± 0.04 | 0.92 ± 0.06 |
|                           | 60            | 1.06 ± 0.04                    | 1.24 ± 0.06 | 1.25 ± 0.02 | 1.25 ± 0.04 | 1.08 ± 0.04                      | 1.18 ± 0.06 | 1.32 ± 0.06 | 1.24 ± 0.04 |
|                           | 100           | 0.95 ± 0.04                    | 0.94 ± 0.06 | 0.96 ± 0.06 | 0.96 ± 0.04 | 0.92 ± 0.03                      | 1.01 ± 0.05 | 0.98 ± 0.06 | 0.98 ± 0.06 |
|                           | 150           | 0.82 ± 0.03                    | 0.90 ± 0.05 | 0.93 ± 0.02 | 0.91 ± 0.05 | 0.98 ± 0.03                      | 0.78 ± 0.03 | 0.96 ± 0.06 | 0.96 ± 0.06 |
| temporal/occipital cortex | 30            | 0.59 ± 0.03                    | 0.56 ± 0.03 | 0.64 ± 0.04 | 0.63 ± 0.02 | 0.69 ± 0.05                      | 0.64 ± 0.04 | 0.64 ± 0.05 | 0.64 ± 0.02 |
|                           | 60            | 0.67 ± 0.02                    | 0.69 ± 0.05 | 0.72 ± 0.04 | 0.64 ± 0.03 | 0.68 ± 0.03                      | 0.66 ± 0.03 | 0.71 ± 0.03 | 0.67 ± 0.03 |
|                           | 100           | 0.52 ± 0.02                    | 0.55 ± 0.04 | 0.55 ± 0.03 | 0.57 ± 0.02 | 0.58 ± 0.02                      | 0.57 ± 0.03 | 0.58 ± 0.03 | 0.59 ± 0.02 |
|                           | 150           | 0.76 ± 0.02                    | 0.72 ± 0.04 | 0.80 ± 0.03 | 0.74 ± 0.03 | 0.77 ± 0.04                      | 0.72 ± 0.05 | 0.86 ± 0.05 | 0.80 ± 0.04 |
| hippocampus               | 30            | 0.66 ± 0.05                    | 0.65 ± 0.03 | 0.65 ± 0.03 | 0.68 ± 0.03 | 0.66 ± 0.02                      | 0.65 ± 0.02 | 0.66 ± 0.01 | 0.72 ± 0.03 |
|                           | 60            | 1.10 ± 0.07                    | 1.11 ± 0.04 | 1.15 ± 0.03 | 1.19 ± 0.05 | 1.22 ± 0.07                      | 1.21 ± 0.07 | 1.29 ± 0.07 | 1.21 ± 0.02 |
|                           | 100           | 0.85 ± 0.06                    | 0.93 ± 0.03 | 0.91 ± 0.04 | 0.91 ± 0.02 | 0.86 ± 0.05                      | 0.86 ± 0.04 | 0.95 ± 0.04 | 0.96 ± 0.02 |
|                           | 150           | 0.81 ± 0.05                    | 0.85 ± 0.05 | 0.91 ± 0.03 | 0.84 ± 0.03 | 0.86 ± 0.05                      | 0.88 ± 0.03 | 0.96 ± 0.04 | 0.90 ± 0.02 |
| striatum                  | 30            | 4.05 ± 0.26                    | 4.18 ± 0.07 | 3.94 ± 0.08 | 4.54 ± 0.56 | 4.03 ± 0.72                      | 4.87 ± 0.35 | 4.12 ± 0.50 | 4.07 ± 0.31 |
|                           | 60            | 3.77 ± 0.09                    | 3.44 ± 0.32 | 3.55 ± 0.25 | 3.57 ± 0.20 | 3.85 ± 0.06                      | 3.22 ± 0.19 | 3.76 ± 0.20 | 3.87 ± 0.18 |
|                           | 100           | 2.92 ± 0.19                    | 3.32 ± 0.22 | 3.62 ± 0.27 | 3.59 ± 0.33 | 3.25 ± 0.22                      | 3.08 ± 0.15 | 3.48 ± 0.22 | 3.31 ± 0.29 |
|                           | 150           | 2.96 ± 0.12                    | 2.78 ± 0.12 | 3.28 ± 0.15 | 3.20 ± 0.20 | 3.24 ± 0.23                      | 3.03 ± 0.16 | 3.65 ± 0.31 | 3.01 ± 0.15 |
| midbrain                  | 30            | 0.63 ± 0.03                    | 0.73 ± 0.03 | 0.66 ± 0.03 | 0.70 ± 0.04 | 0.64 ± 0.03                      | 0.75 ± 0.02 | 0.66 ± 0.03 | 0.69 ± 0.05 |
|                           | 60            | 0.67 ± 0.03                    | 0.72 ± 0.01 | 0.80 ± 0.04 | 0.76 ± 0.04 | 0.76 ± 0.02                      | 0.69 ± 0.02 | 0.79 ± 0.04 | 0.80 ± 0.04 |
|                           | 100           | 0.60 ± 0.02                    | 0.65 ± 0.03 | 0.68 ± 0.05 | 0.65 ± 0.03 | 0.69 ± 0.03                      | 0.70 ± 0.05 | 0.72 ± 0.04 | 0.72 ± 0.05 |
|                           | 150           | 0.52 ± 0.03                    | 0.53 ± 0.03 | 0.55 ± 0.02 | 0.55 ± 0.03 | 0.59 ± 0.03                      | 0.51 ± 0.01 | 0.58 ± 0.04 | 0.57 ± 0.02 |
| brainstem                 | 30            | 1.76 ± 0.05                    | 1.72 ± 0.05 | 1.95 ± 0.03 | 1.81 ± 0.07 | 1.88 ± 0.05                      | 1.74 ± 0.04 | 1.97 ± 0.04 | 1.85 ± 0.04 |
|                           | 60            | 1.10 ± 0.03                    | 1.10 ± 0.03 | 1.18 ± 0.04 | 1.27 ± 0.05 | 1.19 ± 0.07                      | 1.16 ± 0.03 | 1.15 ± 0.04 | 1.26 ± 0.02 |
|                           | 100           | 0.86 ± 0.01                    | 0.94 ± 0.03 | 1.03 ± 0.03 | 0.99 ± 0.02 | 0.99 ± 0.03                      | 0.93 ± 0.04 | 1.04 ± 0.05 | 1.01 ± 0.03 |
|                           | 150           | 1.13 ± 0.05                    | 1.14 ± 0.06 | 1.21 ± 0.05 | 1.28 ± 0.08 | 1.21 ± 0.04                      | 1.09 ± 0.02 | 1.30 ± 0.05 | 1.29 ± 0.05 |

Data represent mean ± SE obtained from six animals in each treatment group for each age and sex. Results of multivariate ANOVA are provided in the main text. Note that the assays for each region and age were run in separate experiments, so absolute values cannot be compared strictly across ages or between regions. Accordingly, statistical comparisons in the main text were conducted on log-transformed data, which evaluates the treatment differences as a proportion to control values, rather than as an arithmetic difference. Representing the data as proportional differences (percent control) enables a full comparison of treatment effects and treatment interactions with all the other variables, even though absolute values for the controls cannot be compared across regions and ages.

Abbreviations: Nic 0.2 = Nicotine 0.2 mg/kg/day; Nic 2 = Nicotine 2 mg/kg/day.

**TABLE S3: HC3 Binding (mean ± SE)**

| Region                    | Postnatal Age | Male (fmol/mg protein) |            |            |            | Female (fmol/mg protein) |            |            |            |
|---------------------------|---------------|------------------------|------------|------------|------------|--------------------------|------------|------------|------------|
|                           |               | Control                | TSE        | Nic 0.2    | Nic 2      | Control                  | TSE        | Nic 0.2    | Nic 2      |
| frontal/parietal cortex   | 30            | 15.4 ± 1.3             | 13.2 ± 0.7 | 17.0 ± 1.2 | 15.5 ± 1.6 | 15.6 ± 2.0               | 14.2 ± 1.2 | 16.3 ± 1.6 | 14.2 ± 1.6 |
|                           | 60            | 15.4 ± 0.9             | 15.9 ± 1.3 | 18.8 ± 0.9 | 16.4 ± 1.3 | 17.3 ± 1.1               | 15.7 ± 1.6 | 19.7 ± 2.2 | 16.2 ± 0.6 |
|                           | 100           | 18.5 ± 1.1             | 15.7 ± 1.0 | 16.3 ± 0.8 | 16.1 ± 1.7 | 16.8 ± 1.4               | 16.4 ± 0.6 | 17.6 ± 1.0 | 17.8 ± 0.9 |
|                           | 150           | 15.0 ± 1.5             | 14.5 ± 1.0 | 15.3 ± 1.0 | 13.6 ± 0.7 | 16.4 ± 1.1               | 12.7 ± 0.6 | 15.4 ± 1.6 | 16.9 ± 1.6 |
| temporal/occipital cortex | 30            | 12.7 ± 0.6             | 11.0 ± 0.5 | 13.0 ± 0.7 | 10.6 ± 0.9 | 13.2 ± 0.8               | 12.0 ± 1.3 | 12.4 ± 0.7 | 11.0 ± 1.3 |
|                           | 60            | 11.4 ± 0.7             | 10.7 ± 1.0 | 12.8 ± 0.7 | 10.3 ± 0.4 | 12.7 ± 0.9               | 10.2 ± 0.5 | 11.9 ± 1.1 | 10.6 ± 0.5 |
|                           | 100           | 11.1 ± 0.3             | 10.8 ± 0.6 | 11.5 ± 0.7 | 10.6 ± 0.9 | 10.5 ± 0.2               | 11.0 ± 0.6 | 12.3 ± 1.0 | 12.6 ± 0.8 |
|                           | 150           | 11.8 ± 0.6             | 9.7 ± 0.6  | 11.9 ± 0.5 | 9.9 ± 0.6  | 11.5 ± 0.5               | 9.4 ± 0.4  | 11.7 ± 0.8 | 11.3 ± 0.4 |
| hippocampus               | 30            | 19.6 ± 1.9             | 14.6 ± 0.4 | 17.5 ± 1.4 | 16.2 ± 2.0 | 15.4 ± 1.3               | 16.1 ± 0.9 | 15.7 ± 1.7 | 13.1 ± 1.3 |
|                           | 60            | 16.8 ± 0.6             | 13.8 ± 0.9 | 17.2 ± 1.6 | 14.6 ± 0.7 | 17.0 ± 0.7               | 14.9 ± 1.2 | 17.1 ± 2.5 | 14.4 ± 0.7 |
|                           | 100           | 13.6 ± 0.6             | 12.1 ± 1.0 | 13.6 ± 0.8 | 14.2 ± 1.4 | 14.5 ± 1.2               | 12.7 ± 1.2 | 14.3 ± 1.0 | 14.7 ± 0.7 |
|                           | 150           | 14.6 ± 0.6             | 12.3 ± 0.7 | 14.1 ± 0.4 | 13.4 ± 0.8 | 13.0 ± 0.3               | 12.7 ± 0.5 | 14.5 ± 0.6 | 13.4 ± 0.7 |
| striatum                  | 30            | 81 ± 11                | 76 ± 8     | 89 ± 11    | 72 ± 10    | 76 ± 6                   | 88 ± 5     | 73 ± 7     | 62 ± 6     |
|                           | 60            | 91 ± 4                 | 65 ± 6     | 97 ± 8     | 78 ± 7     | 84 ± 4                   | 58 ± 4     | 85 ± 8     | 71 ± 9     |
|                           | 100           | 75 ± 3                 | 79 ± 7     | 99 ± 10    | 99 ± 11    | 78 ± 6                   | 79 ± 8     | 97 ± 8     | 90 ± 9     |
|                           | 150           | 66 ± 5                 | 64 ± 7     | 77 ± 6     | 77 ± 4     | 75 ± 5                   | 63 ± 5     | 78 ± 7     | 77 ± 2     |
| midbrain                  | 30            | 13.0 ± 1.1             | 12.6 ± 1.3 | 14.0 ± 1.2 | 12.1 ± 1.4 | 13.2 ± 0.8               | 13.4 ± 1.1 | 12.9 ± 0.8 | 11.3 ± 1.0 |
|                           | 60            | 11.6 ± 0.7             | 10.2 ± 0.4 | 12.0 ± 1.1 | 11.4 ± 0.6 | 9.1 ± 0.6                | 9.1 ± 0.9  | 10.8 ± 0.5 | 10.7 ± 1.0 |
|                           | 100           | 12.0 ± 0.5             | 11.6 ± 0.8 | 11.3 ± 0.7 | 11.8 ± 0.5 | 13.2 ± 1.0               | 12.2 ± 1.2 | 12.3 ± 0.9 | 11.6 ± 0.3 |
|                           | 150           | 11.2 ± 0.6             | 10.7 ± 0.7 | 10.9 ± 0.5 | 11.7 ± 1.1 | 11.8 ± 0.6               | 10.2 ± 0.4 | 10.8 ± 0.4 | 11.7 ± 0.7 |
| brainstem                 | 30            | 10.7 ± 0.5             | 10.9 ± 0.8 | 12.6 ± 0.6 | 10.4 ± 0.7 | 11.2 ± 0.6               | 11.6 ± 1.0 | 11.8 ± 0.9 | 12.1 ± 1.6 |
|                           | 60            | 6.8 ± 0.3              | 6.4 ± 0.4  | 6.9 ± 0.4  | 7.0 ± 0.4  | 6.3 ± 0.3                | 5.9 ± 0.2  | 6.6 ± 0.3  | 6.3 ± 0.4  |
|                           | 100           | 6.9 ± 0.2              | 5.8 ± 0.2  | 6.6 ± 0.3  | 6.4 ± 0.4  | 6.3 ± 0.2                | 5.6 ± 0.2  | 6.3 ± 0.3  | 6.8 ± 0.4  |
|                           | 150           | 6.1 ± 0.4              | 6.2 ± 0.6  | 5.7 ± 0.3  | 5.7 ± 0.4  | 5.5 ± 0.2                | 5.5 ± 0.3  | 6.3 ± 0.3  | 5.8 ± 0.4  |

Data represent mean ± SE obtained from six animals in each treatment group for each age and sex. Results of multivariate ANOVA are provided in the main text. Note that the assays for each region and age were run in separate experiments, so absolute values cannot be compared strictly across ages or between regions. Accordingly, statistical comparisons in the main text were conducted on log-transformed data, which evaluates the treatment differences as a proportion to control values, rather than as an arithmetic difference. Representing the data as proportional differences (percent control) enables a full comparison of treatment effects and treatment interactions with all the other variables, even though absolute values for the controls cannot be compared across regions and ages. Abbreviations: Nic 0.2 = Nicotine 0.2 mg/kg/day; Nic 2 = Nicotine 2 mg/kg/day.

**TABLE S4: HC3/ChAT ratio (mean ± SE)**

| Region                    | Postnatal Age | Male       |            |            |            | Female     |            |            |            |
|---------------------------|---------------|------------|------------|------------|------------|------------|------------|------------|------------|
|                           |               | Control    | TSE        | Nic 0.2    | Nic 2      | Control    | TSE        | Nic 0.2    | Nic 2      |
| frontal/parietal cortex   | 30            | 19.3 ± 2.0 | 15.9 ± 0.5 | 17.3 ± 1.0 | 17.1 ± 2.0 | 18.2 ± 2.1 | 17.3 ± 1.2 | 17.4 ± 1.5 | 15.9 ± 2.0 |
|                           | 60            | 14.6 ± 0.8 | 13.7 ± 0.7 | 14.7 ± 0.6 | 13.1 ± 0.8 | 15.6 ± 0.8 | 13.3 ± 1.1 | 15.0 ± 1.6 | 13.0 ± 0.3 |
|                           | 100           | 19.5 ± 1.1 | 16.8 ± 1.0 | 17.2 ± 0.9 | 17.0 ± 2.1 | 18.3 ± 1.2 | 16.4 ± 0.6 | 18.1 ± 1.1 | 18.3 ± 0.6 |
|                           | 150           | 19.7 ± 2.3 | 16.1 ± 1.0 | 16.5 ± 1.3 | 14.9 ± 0.5 | 16.7 ± 0.7 | 16.4 ± 0.9 | 16.3 ± 2.0 | 17.5 ± 1.1 |
| temporal/occipital cortex | 30            | 21.3 ± 2.1 | 19.9 ± 1.5 | 21.2 ± 2.2 | 17.3 ± 2.0 | 20.0 ± 1.9 | 18.9 ± 1.8 | 19.5 ± 0.7 | 17.1 ± 2.0 |
|                           | 60            | 17.1 ± 1.0 | 15.5 ± 0.5 | 18.0 ± 1.0 | 16.1 ± 0.6 | 18.6 ± 0.7 | 15.5 ± 0.7 | 17.2 ± 2.0 | 15.8 ± 0.9 |
|                           | 100           | 21.5 ± 1.3 | 20.2 ± 2.1 | 20.9 ± 0.9 | 18.6 ± 1.3 | 18.2 ± 0.8 | 19.3 ± 0.8 | 21.4 ± 1.5 | 21.1 ± 1.0 |
|                           | 150           | 15.5 ± 0.7 | 13.5 ± 1.1 | 15.0 ± 1.0 | 13.5 ± 0.8 | 15.0 ± 0.3 | 13.3 ± 1.0 | 13.8 ± 1.3 | 14.2 ± 0.6 |
| hippocampus               | 30            | 29.7 ± 1.8 | 22.7 ± 1.3 | 27.2 ± 1.8 | 23.6 ± 2.5 | 23.4 ± 2.1 | 25.0 ± 1.8 | 23.8 ± 2.4 | 18.4 ± 1.9 |
|                           | 60            | 15.8 ± 1.5 | 12.1 ± 0.9 | 15.0 ± 1.5 | 12.3 ± 0.4 | 13.6 ± 0.7 | 12.4 ± 1.0 | 13.0 ± 1.4 | 11.9 ± 0.6 |
|                           | 100           | 16.4 ± 1.1 | 13.2 ± 1.3 | 15.0 ± 1.2 | 15.7 ± 1.6 | 17.0 ± 1.6 | 15.1 ± 2.0 | 15.0 ± 1.0 | 15.3 ± 0.8 |
|                           | 150           | 18.4 ± 1.5 | 14.5 ± 0.4 | 15.7 ± 0.8 | 16.0 ± 0.8 | 15.4 ± 0.9 | 14.5 ± 0.7 | 15.1 ± 0.6 | 15.1 ± 0.7 |
| striatum                  | 30            | 18.3 ± 3.3 | 16.3 ± 2.2 | 20.9 ± 1.4 | 12.7 ± 2.5 | 21.4 ± 3.1 | 18.5 ± 1.4 | 17.6 ± 2.2 | 16.6 ± 3.1 |
|                           | 60            | 24.2 ± 1.4 | 19.0 ± 0.5 | 28.6 ± 2.1 | 21.7 ± 1.2 | 22.1 ± 1.1 | 18.2 ± 1.2 | 23.6 ± 2.3 | 20.2 ± 1.3 |
|                           | 100           | 27.0 ± 1.8 | 23.7 ± 1.5 | 27.4 ± 1.9 | 29.8 ± 3.8 | 24.0 ± 1.0 | 24.4 ± 3.1 | 28.1 ± 2.2 | 27.3 ± 1.3 |
|                           | 150           | 22.3 ± 1.4 | 22.8 ± 1.8 | 23.5 ± 1.5 | 24.4 ± 1.7 | 23.5 ± 1.6 | 20.7 ± 0.6 | 21.4 ± 1.0 | 25.7 ± 1.2 |
| midbrain                  | 30            | 20.8 ± 1.6 | 17.8 ± 2.4 | 21.3 ± 1.5 | 17.3 ± 1.7 | 21.2 ± 2.0 | 17.8 ± 1.3 | 19.8 ± 1.6 | 16.5 ± 1.5 |
|                           | 60            | 17.1 ± 1.2 | 14.2 ± 0.6 | 15.3 ± 1.8 | 15.4 ± 1.4 | 12.7 ± 0.5 | 13.1 ± 1.0 | 13.9 ± 0.9 | 13.5 ± 1.4 |
|                           | 100           | 19.8 ± 0.4 | 17.8 ± 0.7 | 17.8 ± 0.7 | 18.3 ± 1.0 | 19.3 ± 0.9 | 18.4 ± 1.5 | 17.1 ± 0.8 | 17.4 ± 0.3 |
|                           | 150           | 21.2 ± 1.4 | 21.4 ± 0.8 | 20.0 ± 1.3 | 21.2 ± 1.0 | 20.1 ± 0.6 | 19.9 ± 0.3 | 19.1 ± 1.6 | 20.6 ± 0.9 |
| brainstem                 | 30            | 6.1 ± 0.1  | 6.4 ± 0.5  | 6.5 ± 0.2  | 5.8 ± 0.5  | 6.0 ± 0.5  | 6.7 ± 0.7  | 6.0 ± 0.5  | 6.6 ± 0.8  |
|                           | 60            | 6.2 ± 0.3  | 5.9 ± 0.4  | 5.9 ± 0.4  | 5.6 ± 0.4  | 5.4 ± 0.4  | 5.0 ± 0.2  | 5.7 ± 0.3  | 5.0 ± 0.3  |
|                           | 100           | 8.1 ± 0.2  | 6.2 ± 0.3  | 6.4 ± 0.2  | 6.6 ± 0.6  | 6.4 ± 0.3  | 6.1 ± 0.3  | 6.2 ± 0.4  | 6.6 ± 0.5  |
|                           | 150           | 5.5 ± 0.5  | 5.3 ± 0.6  | 4.8 ± 0.3  | 4.6 ± 0.5  | 4.6 ± 0.3  | 5.1 ± 0.3  | 4.9 ± 0.4  | 4.5 ± 0.2  |

Data represent mean ± SE obtained from six animals in each treatment group for each age and sex. Results of multivariate ANOVA are provided in the main text. Note that the assays for each region and age were run in separate experiments, so absolute values cannot be compared strictly across ages or between regions. Accordingly, statistical comparisons in the main text were conducted on log-transformed data, which evaluates the treatment differences as a proportion to control values, rather than as an arithmetic difference. Representing the data as proportional differences (percent control) enables a full comparison of treatment effects and treatment interactions with all the other variables, even though absolute values for the controls cannot be compared across regions and ages. Abbreviations: Nic 0.2 = Nicotine 0.2 mg/kg/day; Nic 2 = Nicotine 2 mg/kg/day.

**TABLE S5: nAChR Binding (mean  $\pm$  SE)**

| Region                    | Postnatal Age | Male (fmol/mg protein) |             |             |            | Female (fmol/mg protein) |             |            |            |
|---------------------------|---------------|------------------------|-------------|-------------|------------|--------------------------|-------------|------------|------------|
|                           |               | Control                | TSE         | Nic 0.2     | Nic 2      | Control                  | TSE         | Nic 0.2    | Nic 2      |
| frontal/parietal cortex   | 30            | 53 $\pm$ 7             | 58 $\pm$ 7  | 70 $\pm$ 7  | 63 $\pm$ 6 | 67 $\pm$ 7               | 52 $\pm$ 9  | 65 $\pm$ 5 | 60 $\pm$ 6 |
|                           | 60            | 56 $\pm$ 4             | 50 $\pm$ 6  | 62 $\pm$ 4  | 59 $\pm$ 5 | 51 $\pm$ 7               | 45 $\pm$ 5  | 56 $\pm$ 5 | 59 $\pm$ 2 |
|                           | 100           | 54 $\pm$ 2             | 52 $\pm$ 4  | 52 $\pm$ 3  | 53 $\pm$ 4 | 57 $\pm$ 3               | 51 $\pm$ 3  | 50 $\pm$ 3 | 52 $\pm$ 2 |
|                           | 150           | 55 $\pm$ 4             | 50 $\pm$ 2  | 51 $\pm$ 9  | 46 $\pm$ 4 | 45 $\pm$ 6               | 44 $\pm$ 3  | 43 $\pm$ 5 | 47 $\pm$ 7 |
| temporal/occipital cortex | 30            | 63 $\pm$ 9             | 68 $\pm$ 9  | 78 $\pm$ 10 | 69 $\pm$ 4 | 59 $\pm$ 7               | 66 $\pm$ 9  | 73 $\pm$ 6 | 65 $\pm$ 7 |
|                           | 60            | 63 $\pm$ 4             | 46 $\pm$ 10 | 67 $\pm$ 7  | 57 $\pm$ 5 | 52 $\pm$ 6               | 48 $\pm$ 6  | 54 $\pm$ 8 | 60 $\pm$ 3 |
|                           | 100           | 56 $\pm$ 3             | 58 $\pm$ 5  | 59 $\pm$ 6  | 61 $\pm$ 2 | 58 $\pm$ 3               | 56 $\pm$ 3  | 58 $\pm$ 2 | 64 $\pm$ 3 |
|                           | 150           | 57 $\pm$ 5             | 61 $\pm$ 2  | 60 $\pm$ 7  | 61 $\pm$ 3 | 54 $\pm$ 5               | 50 $\pm$ 5  | 65 $\pm$ 2 | 59 $\pm$ 6 |
| hippocampus               | 30            | 53 $\pm$ 5             | 35 $\pm$ 9  | 53 $\pm$ 2  | 57 $\pm$ 8 | 45 $\pm$ 5               | 26 $\pm$ 9  | 45 $\pm$ 4 | 43 $\pm$ 4 |
|                           | 60            | 50 $\pm$ 5             | 43 $\pm$ 6  | 52 $\pm$ 4  | 48 $\pm$ 4 | 46 $\pm$ 7               | 44 $\pm$ 3  | 39 $\pm$ 7 | 52 $\pm$ 3 |
|                           | 100           | 30 $\pm$ 3             | 31 $\pm$ 2  | 25 $\pm$ 4  | 33 $\pm$ 2 | 33 $\pm$ 3               | 30 $\pm$ 3  | 33 $\pm$ 3 | 36 $\pm$ 2 |
|                           | 150           | 27 $\pm$ 2             | 31 $\pm$ 1  | 26 $\pm$ 4  | 31 $\pm$ 3 | 24 $\pm$ 2               | 29 $\pm$ 4  | 31 $\pm$ 2 | 26 $\pm$ 3 |
| midbrain                  | 30            | 78 $\pm$ 5             | 66 $\pm$ 10 | 82 $\pm$ 6  | 79 $\pm$ 4 | 64 $\pm$ 6               | 54 $\pm$ 10 | 81 $\pm$ 3 | 77 $\pm$ 5 |
|                           | 60            | 66 $\pm$ 4             | 59 $\pm$ 3  | 63 $\pm$ 4  | 64 $\pm$ 3 | 48 $\pm$ 6               | 52 $\pm$ 4  | 64 $\pm$ 4 | 61 $\pm$ 3 |
|                           | 100           | 55 $\pm$ 2             | 56 $\pm$ 1  | 60 $\pm$ 2  | 62 $\pm$ 2 | 62 $\pm$ 1               | 61 $\pm$ 2  | 60 $\pm$ 2 | 65 $\pm$ 2 |
|                           | 150           | 52 $\pm$ 4             | 51 $\pm$ 2  | 57 $\pm$ 7  | 55 $\pm$ 4 | 50 $\pm$ 3               | 48 $\pm$ 3  | 43 $\pm$ 5 | 47 $\pm$ 6 |
| brainstem                 | 30            | 34 $\pm$ 4             | 35 $\pm$ 5  | 42 $\pm$ 3  | 44 $\pm$ 2 | 34 $\pm$ 3               | 19 $\pm$ 6  | 37 $\pm$ 3 | 41 $\pm$ 2 |
|                           | 60            | 30 $\pm$ 1             | 26 $\pm$ 2  | 29 $\pm$ 2  | 31 $\pm$ 1 | 23 $\pm$ 4               | 25 $\pm$ 2  | 29 $\pm$ 2 | 28 $\pm$ 1 |
|                           | 100           | 27 $\pm$ 1             | 25 $\pm$ 1  | 28 $\pm$ 2  | 28 $\pm$ 1 | 28 $\pm$ 1               | 24 $\pm$ 1  | 26 $\pm$ 1 | 29 $\pm$ 2 |
|                           | 150           | 26 $\pm$ 1             | 26 $\pm$ 2  | 24 $\pm$ 4  | 25 $\pm$ 2 | 24 $\pm$ 1               | 23 $\pm$ 1  | 27 $\pm$ 1 | 24 $\pm$ 2 |

Data represent mean  $\pm$  SE obtained from six animals in each treatment group for each age and sex. Results of multivariate ANOVA are provided in the main text. Note that the assays for each region and age were run in separate experiments, so absolute values cannot be compared strictly across ages or between regions. Accordingly, statistical comparisons in the main text were conducted on log-transformed data, which evaluates the treatment differences as a proportion to control values, rather than as an arithmetic difference. Representing the data as proportional differences (percent control) enables a full comparison of treatment effects and treatment interactions with all the other variables, even though absolute values for the controls cannot be compared across regions and ages. Abbreviations: Nic 0.2 = Nicotine 0.2 mg/kg/day; Nic 2 = Nicotine 2 mg/kg/day.

**TABLE S6: 5HT Receptor Binding (mean ± SE)**

| Subtype and Region               | Postnatal Age | Male (fmol/mg protein) |            |            |            | Female (fmol/mg protein) |            |            |            |
|----------------------------------|---------------|------------------------|------------|------------|------------|--------------------------|------------|------------|------------|
| 5HT <sub>1A</sub> Receptors      |               | Control                | TSE        | Nic 0.2    | Nic 2      | Control                  | TSE        | Nic 0.2    | Nic 2      |
| frontal/parietal cortex          | 30            | 84 ± 10                | 108 ± 3    | 106 ± 10   | 91 ± 11    | 100 ± 5                  | 92 ± 10    | 102 ± 8    | 89 ± 6     |
|                                  | 60            | 86 ± 3                 | 91 ± 7     | 101 ± 6    | 88 ± 7     | 95 ± 3                   | 78 ± 6     | 101 ± 7    | 92 ± 7     |
|                                  | 100           | 97 ± 12                | 90 ± 14    | 91 ± 10    | 92 ± 13    | 98 ± 11                  | 99 ± 9     | 101 ± 14   | 93 ± 10    |
|                                  | 150           | 80 ± 5                 | 77 ± 5     | 82 ± 5     | 72 ± 2     | 80 ± 4                   | 76 ± 5     | 77 ± 8     | 85 ± 8     |
| temporal/occipital cortex        | 30            | 102 ± 14               | 123 ± 2    | 124 ± 5    | 100 ± 10   | 114 ± 9                  | 115 ± 10   | 118 ± 7    | 100 ± 6    |
|                                  | 60            | 106 ± 5                | 114 ± 4    | 123 ± 3    | 105 ± 3    | 118 ± 5                  | 103 ± 5    | 105 ± 12   | 109 ± 7    |
|                                  | 100           | 106 ± 12               | 98 ± 16    | 125 ± 15   | 120 ± 17   | 113 ± 11                 | 118 ± 11   | 132 ± 17   | 126 ± 18   |
|                                  | 150           | 123 ± 7                | 126 ± 4    | 141 ± 6    | 128 ± 6    | 129 ± 7                  | 99 ± 5     | 134 ± 9    | 145 ± 10   |
| midbrain                         | 30            | 68 ± 3                 | 62 ± 6     | 69 ± 2     | 59 ± 9     | 66 ± 4                   | 53 ± 5     | 67 ± 5     | 56 ± 8     |
|                                  | 60            | 60 ± 3                 | 53 ± 5     | 56 ± 3     | 61 ± 6     | 53 ± 3                   | 44 ± 6     | 55 ± 2     | 54 ± 2     |
|                                  | 100           | 52 ± 2                 | 39 ± 5     | 46 ± 5     | 46 ± 5     | 52 ± 2                   | 50 ± 2     | 59 ± 7     | 46 ± 4     |
|                                  | 150           | 45 ± 2                 | 44 ± 4     | 45 ± 3     | 56 ± 6     | 48 ± 2                   | 44 ± 5     | 45 ± 3     | 52 ± 4     |
| brainstem                        | 30            | 34 ± 2                 | 40 ± 2     | 40 ± 2     | 39 ± 4     | 36 ± 1                   | 36 ± 2     | 42 ± 3     | 38 ± 3     |
|                                  | 60            | 39 ± 2                 | 41 ± 1     | 43 ± 2     | 42 ± 2     | 41 ± 2                   | 35 ± 3     | 39 ± 3     | 40 ± 2     |
|                                  | 100           | 29 ± 2                 | 26 ± 3     | 30 ± 3     | 29 ± 2     | 29 ± 2                   | 26 ± 3     | 30 ± 3     | 29 ± 4     |
|                                  | 150           | 30 ± 2                 | 30 ± 3     | 28 ± 1     | 29 ± 2     | 28 ± 1                   | 26 ± 1     | 31 ± 1     | 30 ± 3     |
| <b>5HT<sub>2</sub> Receptors</b> |               |                        |            |            |            |                          |            |            |            |
| frontal/parietal cortex          | 30            | 55 ± 4                 | 65 ± 5     | 65 ± 1     | 71 ± 4     | 54 ± 7                   | 61 ± 2     | 56 ± 2     | 66 ± 1     |
|                                  | 60            | 51 ± 2                 | 63 ± 1     | 58 ± 1     | 58 ± 2     | 57 ± 3                   | 55 ± 1     | 63 ± 2     | 61 ± 2     |
|                                  | 100           | 56 ± 2                 | 58 ± 2     | 57 ± 2     | 58 ± 2     | 59 ± 2                   | 52 ± 2     | 59 ± 2     | 55 ± 4     |
|                                  | 150           | 46 ± 1                 | 54 ± 2     | 50 ± 2     | 49 ± 1     | 47 ± 2                   | 48 ± 1     | 52 ± 1     | 50 ± 2     |
| temporal/occipital cortex        | 30            | 28 ± 2                 | 30 ± 2     | 33 ± 3     | 34 ± 2     | 34 ± 2                   | 30 ± 1     | 31 ± 2     | 30 ± 2     |
|                                  | 60            | 30 ± 1                 | 34 ± 2     | 33 ± 1     | 31 ± 1     | 34 ± 1                   | 31 ± 1     | 33 ± 1     | 35 ± 1     |
|                                  | 100           | 30 ± 1                 | 33 ± 1     | 32 ± 2     | 32 ± 1     | 32 ± 1                   | 29 ± 1     | 33 ± 1     | 35 ± 2     |
|                                  | 150           | 23 ± 1                 | 29 ± 1     | 27 ± 1     | 27 ± 1     | 26 ± 1                   | 27 ± 2     | 30 ± 1     | 28 ± 1     |
| midbrain                         | 30            | 9.4 ± 0.7              | 1.03 ± 0.5 | 10.3 ± 0.5 | 10.8 ± 1.0 | 9.7 ± 0.7                | 9.9 ± 0.3  | 10.2 ± 0.5 | 10.8 ± 0.4 |
|                                  | 60            | 9.0 ± 0.2              | 8.9 ± 0.3  | 8.7 ± 0.4  | 9.3 ± 0.5  | 8.9 ± 0.3                | 8.7 ± 0.6  | 9.7 ± 0.3  | 9.6 ± 0.4  |
|                                  | 100           | 9.1 ± 0.2              | 10.2 ± 0.5 | 10.5 ± 0.5 | 10.2 ± 0.5 | 11.1 ± 0.8               | 9.1 ± 0.6  | 11.6 ± 0.4 | 11.1 ± 0.8 |
|                                  | 150           | 9.2 ± 0.3              | 9.7 ± 0.3  | 10.0 ± 0.3 | 10.8 ± 0.2 | 9.5 ± 0.4                | 9.3 ± 0.2  | 10.0 ± 0.4 | 10.4 ± 0.3 |
| brainstem                        | 30            | 7.5 ± 0.3              | 8.6 ± 0.3  | 9.1 ± 0.5  | 8.9 ± 0.3  | 8.9 ± 0.3                | 7.9 ± 0.4  | 9.9 ± 0.4  | 8.7 ± 0.3  |
|                                  | 60            | 9.5 ± 0.3              | 10.2 ± 0.2 | 10.5 ± 0.4 | 10.9 ± 0.3 | 10.2 ± 0.3               | 9.3 ± 0.3  | 10.9 ± 0.4 | 10.4 ± 0.2 |
|                                  | 100           | 8.9 ± 0.6              | 10.0 ± 0.8 | 10.8 ± 0.9 | 10.4 ± 0.6 | 10.4 ± 0.3               | 10.8 ± 0.9 | 9.4 ± 0.4  | 10.6 ± 0.9 |
|                                  | 150           | 8.2 ± 0.3              | 8.8 ± 0.4  | 8.5 ± 0.5  | 8.7 ± 0.3  | 8.5 ± 0.4                | 8.5 ± 0.4  | 9.6 ± 0.5  | 9.1 ± 0.5  |

Data represent mean ± SE obtained from six animals in each treatment group for each age and sex. Results of multivariate ANOVA are provided in the main text. Note that the assays for each region and age were run in separate experiments, so absolute values cannot be compared strictly across ages or between regions. Accordingly, statistical comparisons in the main text were conducted on log-transformed data, which evaluates the treatment differences as a proportion to control values, rather than as an arithmetic difference. Representing the data as proportional differences (percent control) enables a full comparison of treatment effects and treatment interactions with all the other variables, even though absolute values for the controls cannot be compared across regions and ages. Abbreviations: Nic 0.2 = Nicotine 0.2 mg/kg/day; Nic 2 = Nicotine 2 mg/kg/day.
